# Supplementary material for: pH-responsive magnetic micelles gelatin-g-poly(NIPAAm-co-DMAAm-co-UA)-g-dextran/Fe3O4 as a hydrophilic drug carrier
Source: Royal Society of Chemistry journal article supplement (doi:10.1039/c7ra01633f), 2017-01-01
Supplement: c7ra01633f1.pdf [file c7ra01633f1.pdf]

## Supplementary information

### Title:

**pH-responsive magnetic micelles gelatin-g-poly(NIPAAm-co-DMAAm-co-UA)-g-dextran/Fe<sub>3</sub>O<sub>4</sub> as hydrophilic drug carrier**

Chao-Ming Su,<sup>a</sup> Chen-Yu Huang,<sup>b</sup> Yao-Li Chen<sup>c</sup> and Tzong-Rong Ger<sup>†a</sup>

- a. Department of Biomedical Engineering, Chung Yuan Christian University, Taoyuan, Taiwan
  - b. Department of Physics and Astronomy, Johns Hopkins University, Baltimore, USA
  - c. Department of General Surgery, Changhua Christian Hospital, Changhua, Taiwan
- † sunbow@cycu.org.tw

**21<sup>st</sup> July 2017**

**Note added after first publication:** This Supplementary Information file replaces that originally published on 30<sup>th</sup> May 2017, and contains a corrected author list.

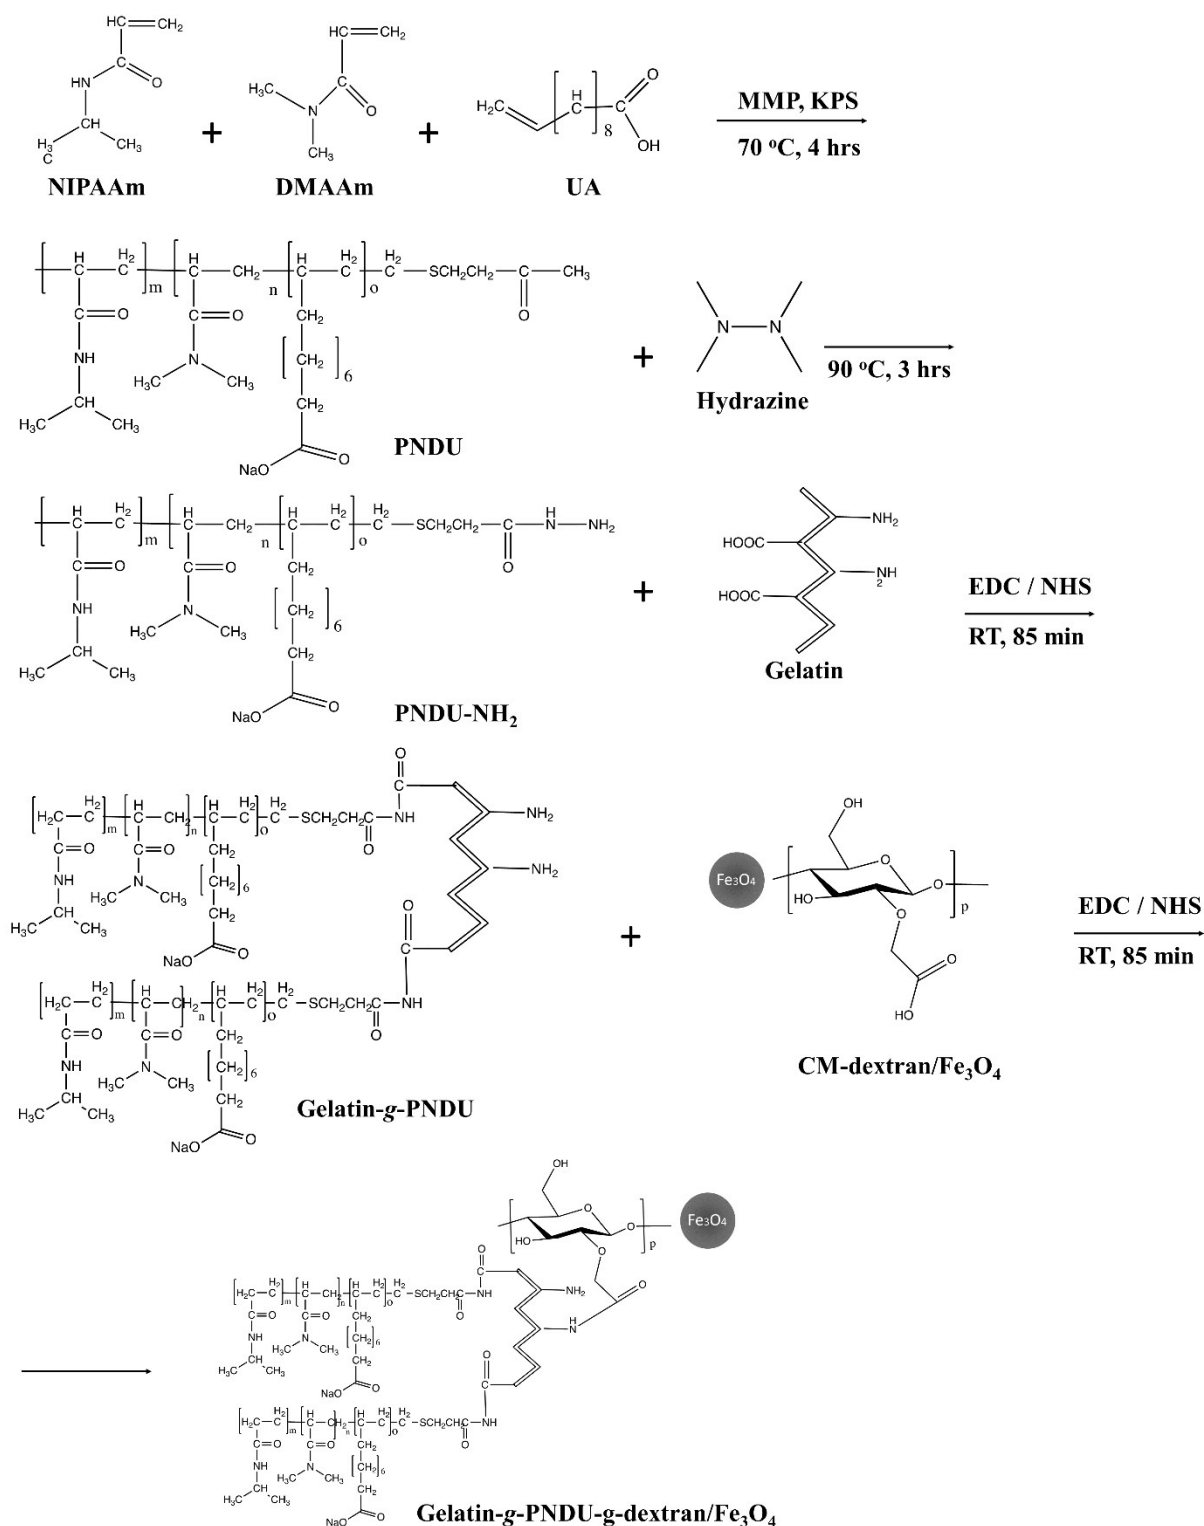

Fig. S1. Schematic diagram of the formation process of Gelatin-g-dextran/Fe<sub>3</sub>O<sub>4</sub> (GPDF) micelles

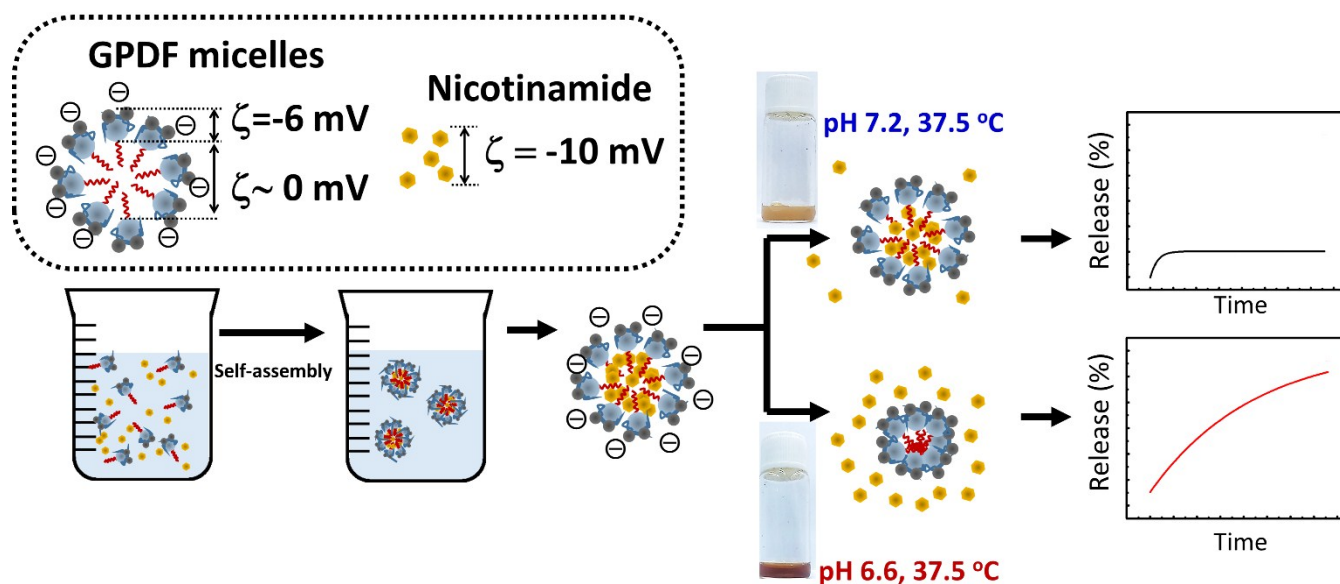

Fig. S2. Schematic diagram show the GPDF encapsulated nicotinamide. Zeta potential ( $\zeta$ ) of GPDF micelle and nicotinamide are indicated.

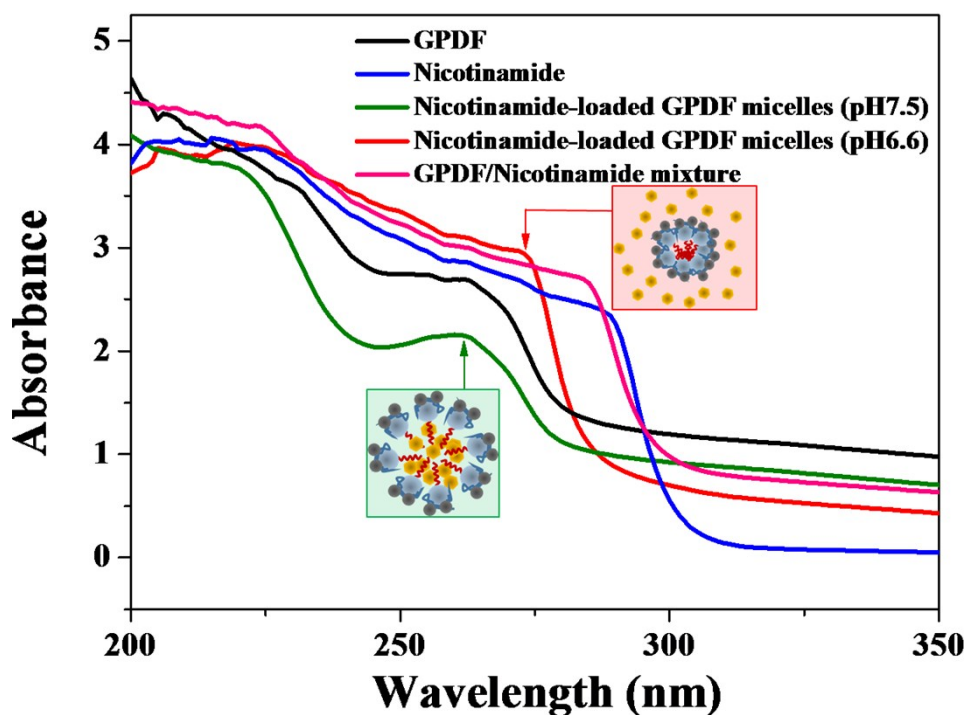

Fig. S3. UV spectra of nicotinamide, GPDF, nicotinamide-loaded GPDF micelles at both pH 7.5 and pH 6.6 and mixture of GPDF and nicotinamide. Nicotinamide-loaded GPDF micelles show clear nicotinamide signal at pH 6.6.

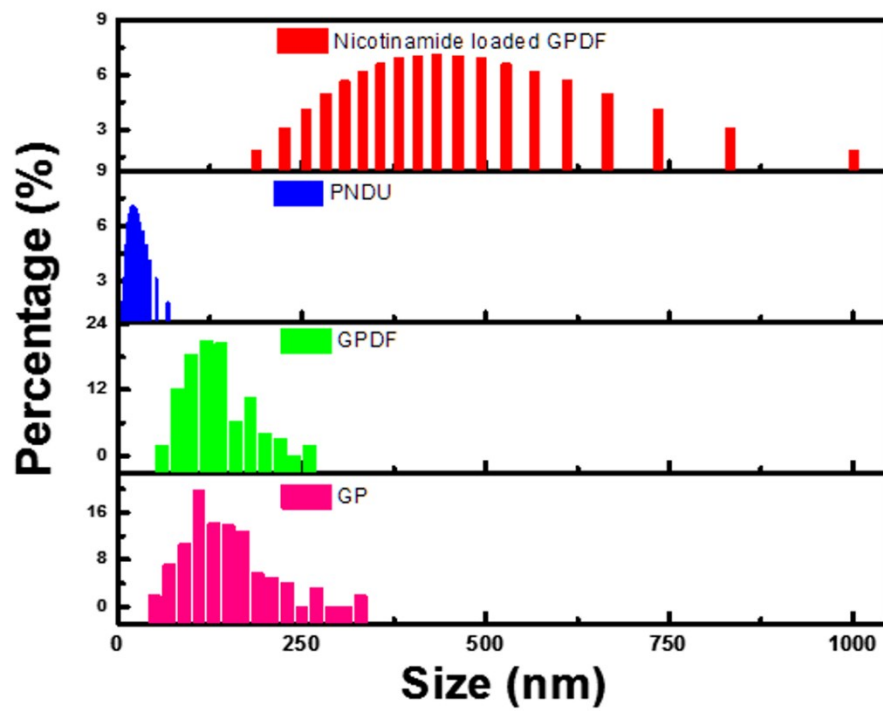

Fig.S4 DLS data of nicotinamide-loaded GPDF micelles, PNDU, the GPDF and GP.
